# Supplementary material for: Genetic Contribution of Synthetic Hexaploid Wheat to CIMMYT’s Spring Bread Wheat Breeding Germplasm
Source: PubMed Central journal article supplement (PMC6710277; doi:10.1038/s41598-019-47936-5), 2019-08-26
Supplement: 41598_2019_47936_MOESM1_ESM.pdf [file 41598_2019_47936_MOESM1_ESM.pdf]

# **Supplementary Figures**

**Genetic Contribution of Synthetic Hexaploid Wheat to CIMMYT's**

**Spring Bread Wheat Breeding Germplasm**

Umesh Rosyara, Masahiro Kishii, Thomas Payne, Carolina Paola Sansaloni, Ravi Prakash Singh,

Hans-Joachim Braun, Susanne Dreisigacker

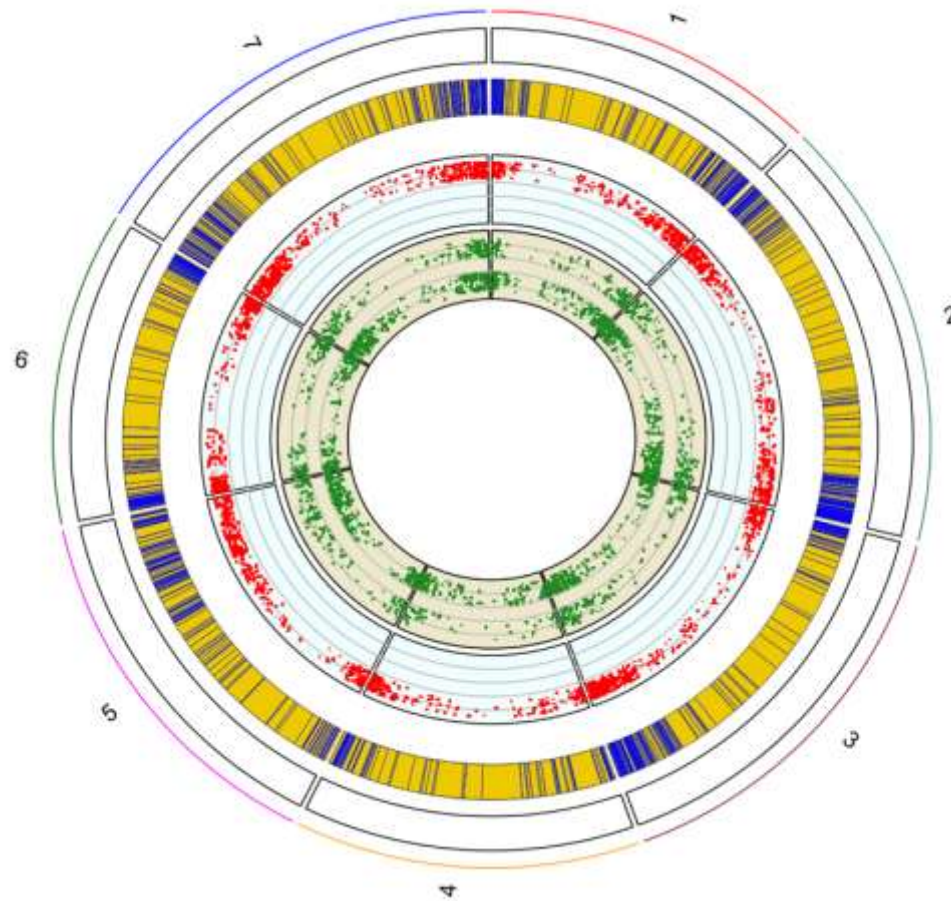

**Figure S1:** SNP markers (2669) and their distribution in the D genome – from outside: track 2 positions of PAV and SNPs, track 3: call rate of each marker (red dots), track 4: frequency difference between the *Ae. tauschii*/synthetic hexaploid wheat population and bread wheat population (green dots).

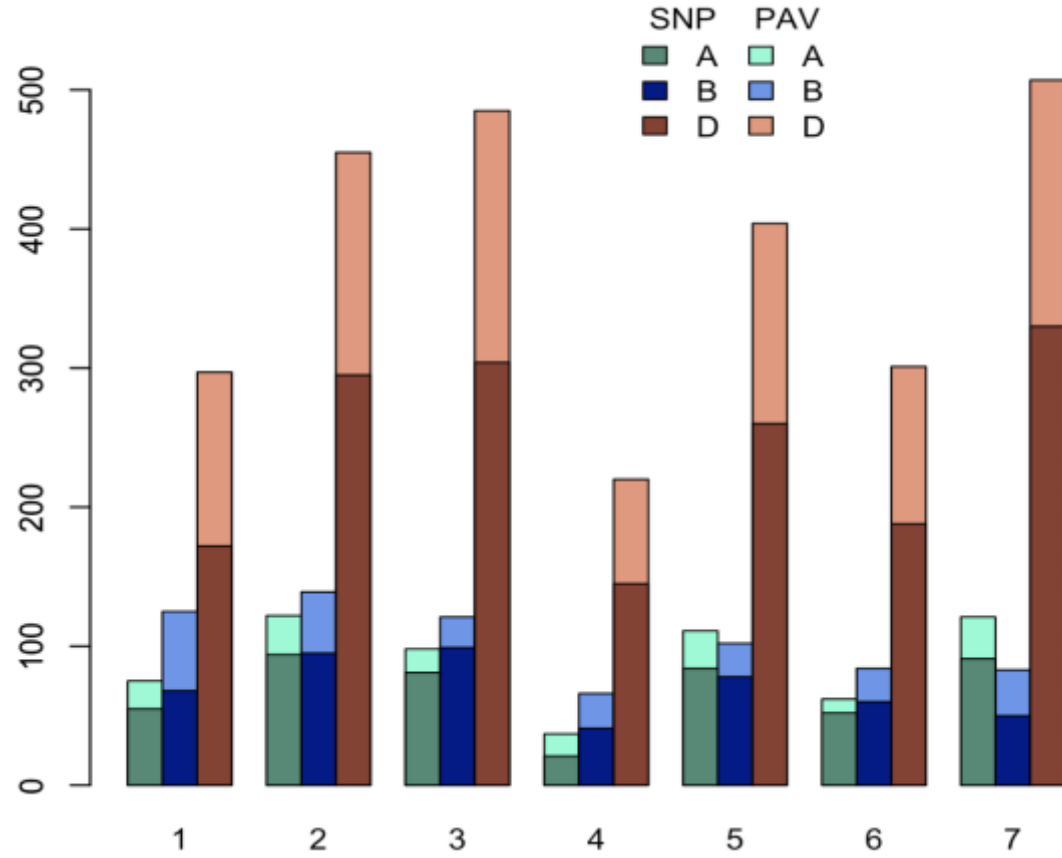

**Figure S2:** Number of genome specific markers with allele frequency difference greater than 0.3 among populations. Number of markers in genomes A and B are based on allele frequency different between durum wheat (AABB) and bread wheat (AABBDD) populations whereas the number of markers in the D genome are based on allele frequency difference between bread wheat (D) and *Ae. tauschii* - synthetic hexaploid wheat (D') populations.

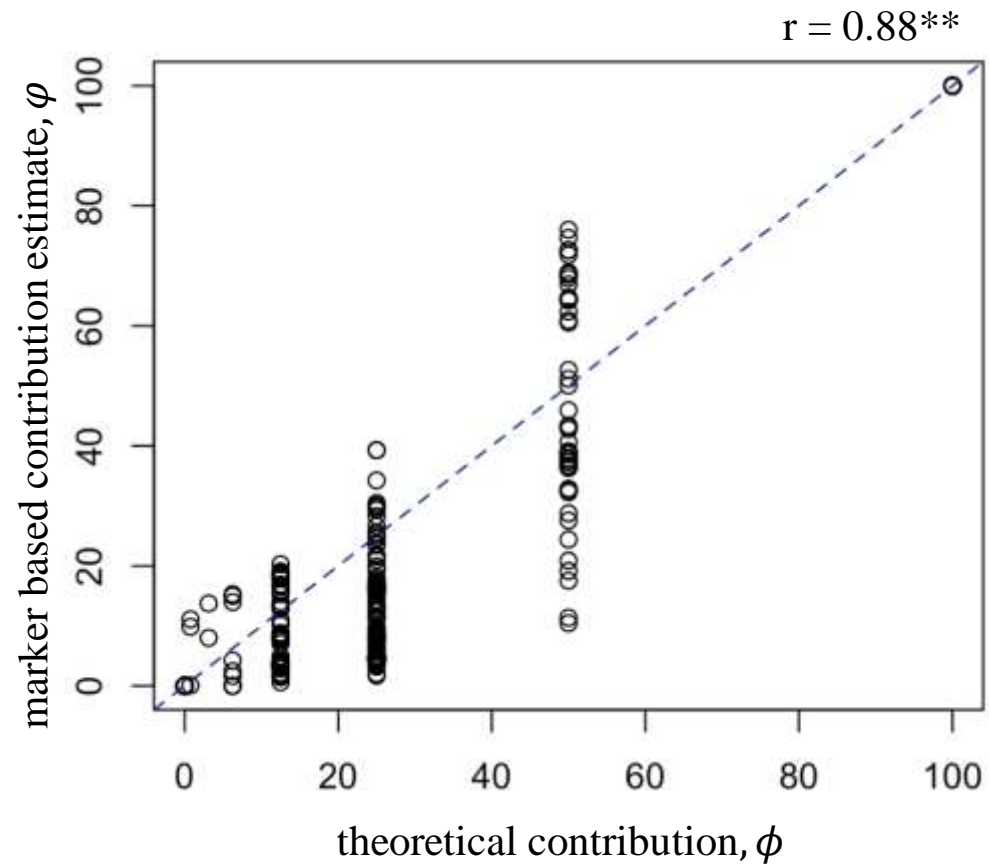

**Figure S3:** Comparison of theoretical contribution estimates versus marker-based contribution estimates

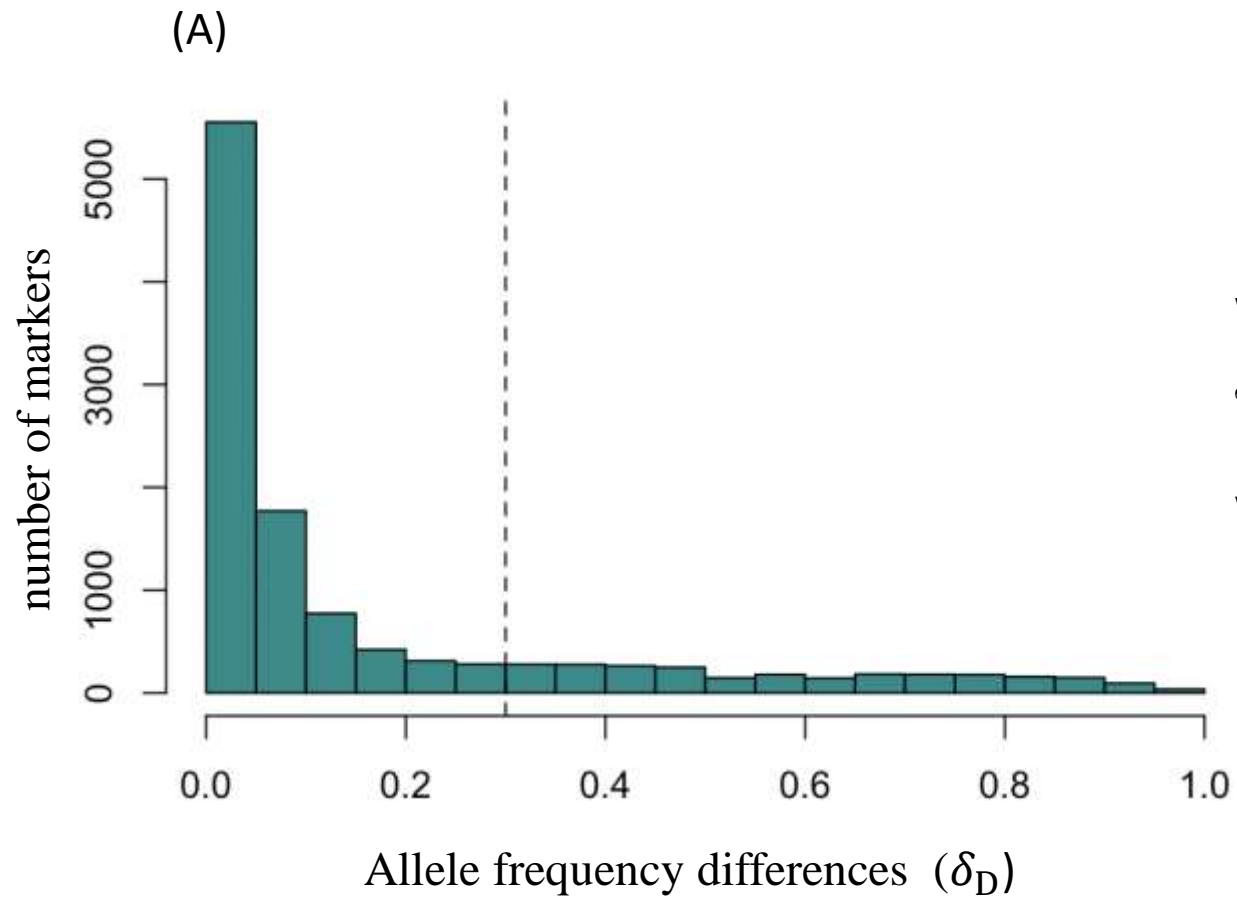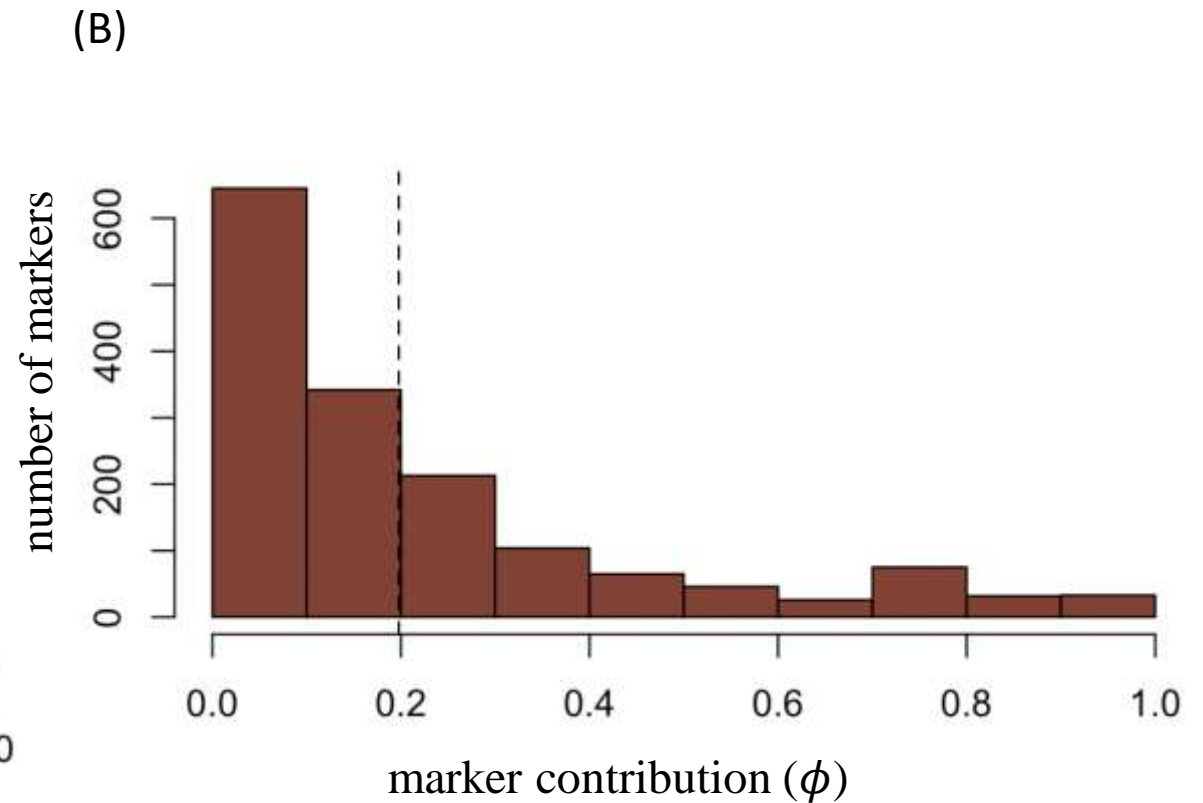

**Figure S4:** (A) Allele frequency differences ( $\delta_D$ ) distribution of all useful D markers and (B) marker contribution ( $\phi$ ) for selected markers with  $\delta_D > 0.30$

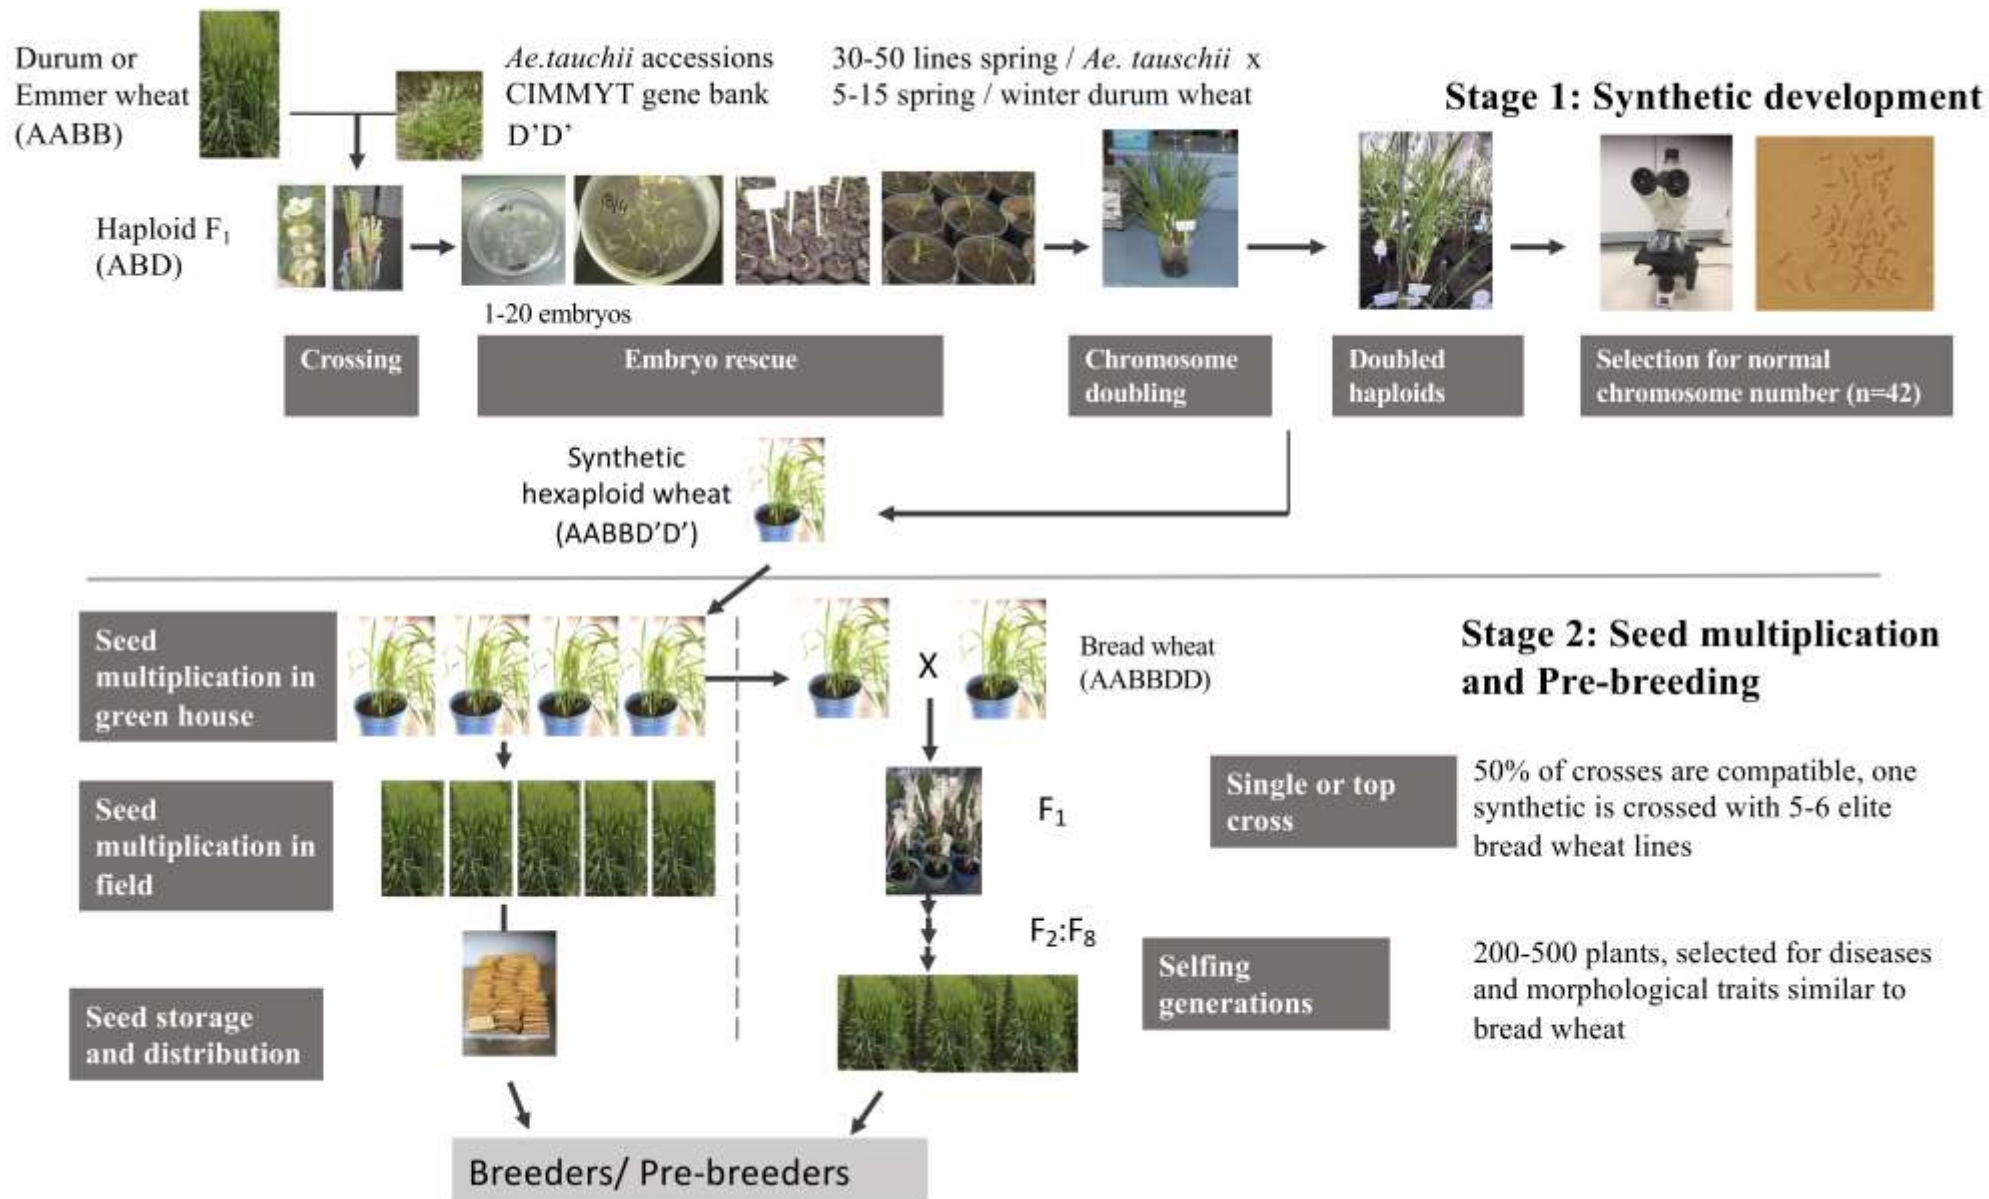

**Figure S5:** Synthetic hexaploid wheat and their derivative development protocol followed by CIMMYT wide-crosses program
